# Supplementary material for: Cerebrovascular Diseases in Workers at Mayak PA: The Difference in Radiation Risk between Incidence and Mortality
Source: PubMed Central journal article supplement (PMC4416824; doi:10.1371/journal.pone.0125904), 2015-05-01
Supplement: pone.0125904.s002.pdf [file pone.0125904.s002.pdf]

|      | LNT          | Quadra-<br>tic | Linear-<br>quad. | Linear-<br>exp. | Linear-<br>thresh. | Step  | Step-<br>linear | 2-line-<br>spline | Sigmoid      | Horm. |
|------|--------------|----------------|------------------|-----------------|--------------------|-------|-----------------|-------------------|--------------|-------|
| no   | -29.8        | -33.7          | -34.0            | -34.0           | -33.5              | -23.7 | -33.8           | -33.9             | -33.9        | -34.0 |
| exp. | <b>-34.6</b> | -36.2          | -37.3            | -37.2           | -37.9              | -28.5 | -38.0           | -37.9             | -37.4        | -37.4 |
| step | <b>-35.8</b> | <b>-37.5</b>   | -38.3            | -38.4           | -38.4              | -28.9 | -39.0           | -38.5             | <b>-38.4</b> | -38.4 |

**Table S1. Deviances for different ERR models of the dose response for CeVD incidence in reactor workers.** In addition to the unmodified analysis, results from effect modification exponential and with a step in age attained are presented. The deviance is presented as the difference from the baseline's deviance. No time lagging was applied. Models that passed the likelihood-ratio test are marked bold.
