# Supplementary material for: Cerebrovascular Diseases in Workers at Mayak PA: The Difference in Radiation Risk between Incidence and Mortality
Source: PubMed Central journal article supplement (PMC4416824; doi:10.1371/journal.pone.0125904), 2015-05-01
Supplement: pone.0125904.s003.pdf [file pone.0125904.s003.pdf]

| LNT         | Quadratic   | Linear-<br>quadratic | Linear-<br>exponential | Linear-<br>threshold | Step         |
|-------------|-------------|----------------------|------------------------|----------------------|--------------|
| <b>-7.4</b> | <b>-8.9</b> | -10.1                | -7.5                   | -10.9                | <b>-12.3</b> |

**Table S2. Deviances for different ERR models of the dose response for stroke incidence, each modified by a decreasing step in age attained.** The deviance is presented as the difference from the baseline's deviance. No time lagging was applied. Models that passed the likelihood-ratio test are marked bold.
